# Supplementary material
Source: Research Square preprint supplement (doi:10.21203/rs.3.rs-9149426/v1)
Supplement: Supplementary file 1 [file d344138d9e66e692a1443af5.docx]

**Supporting Information**

A Power-Autonomous, Fully Edible Tensegrity Robot for Environmental Tasks and Emergency Sustenance

Jingyi Yu 1, #, Shihui Yu 2, #, Mujia Yu 3, Changhong Linghu 4, Jun Shintake 5, Zebing Mao 1, *, Junhui Zhang 1, Bing Xu 1 (*corresponding author)

1. State Key Laboratory of Fluid Power and Mechatronic Systems, Zhejiang University, Hangzhou, China
2. Key Laboratory of Laboratory Medicine, Ministry of Education, Zhejiang Provincial Key Laboratory of Medical Genetics, College of Laboratory Medicine and Life Sciences, Wenzhou Medical University, Wenzhou, China
3. College of Acupuncture and Massage, Jiangxi University of Chinese Medicine, Nanchang, China
4. Department of Mechanical Engineering, College of Engineering, City University of Hong Kong, Hong Kong, China
5. Department of Mechanical and Intelligent Systems Engineering, The University of Electro- communications, 1-5-1 Chofugaoka, Chofu, Tokyo, 182-8585 Japan

* Email: mao.z.aa@zju.edu.cn

**This PDF file includes:**

Supplementary Method

Figures S1 to S3

Tables S1 to S4

Notes for Supplementary Video S1 to S4

Supplementary Reference

**Other supporting information for this manuscript include the following:**

Supplementary Video S1 to S4

**Supplementary Method Section S1. Nutritional profile of the edible tensegrity robot**

The nutritional profile of the fully edible tensegrity robot was quantitatively assessed based on the macronutrient composition of its primary structural components: rigid cookies struts and gelatin-glycerol hydrogel. The nutritional data for the bar cookies (Fig. S1A) were derived from standard nutritional labelling of commercially available products. For the gelatin-glycerol hydrogel, the relative contributions of proteins and carbohydrates were determined according to the specific synthesis formulation of food-grade gelatin and glycerol.

Based on mass distribution analysis, a single standard robotic unit possesses a total mass of approximately 286.00 g. The macronutrient breakdown (Fig. S1B) is as follows: 105.63 g of protein (primarily sourced from the gelatin matrix), 3.77 g of lipids (derived from the bar cookies), and 154.73 g of carbohydrates (contributed by both glycerol and cookies). The total energy content of the robot, , was calculated using standard Atwater factors (*1*, *2*) according to the following equation:

where m denotes the mass (in grams) of each macronutrient component, and the coefficients (4, 9, and 4 kcal/g) represent the specific energy densities for proteins, lipids, and carbohydrates, respectively. Our calculations indicate that a single edible robotic unit provides approximately 1,075 kcal of metabolizable energy, a caloric value roughly equivalent to 11–12 medium-sized apples. The metabolizable energy density of this edible tensegrity robot was determined to be approximately 3,759.44 kcal/kg. Furthermore, the analysis confirms that carbohydrates constitute 54.1% of the system's total mass. This high carbohydrate proportion validates the robot’s potential as a high-energy emergency food source, consistent with the carbohydrate-rich profile described in the main text.


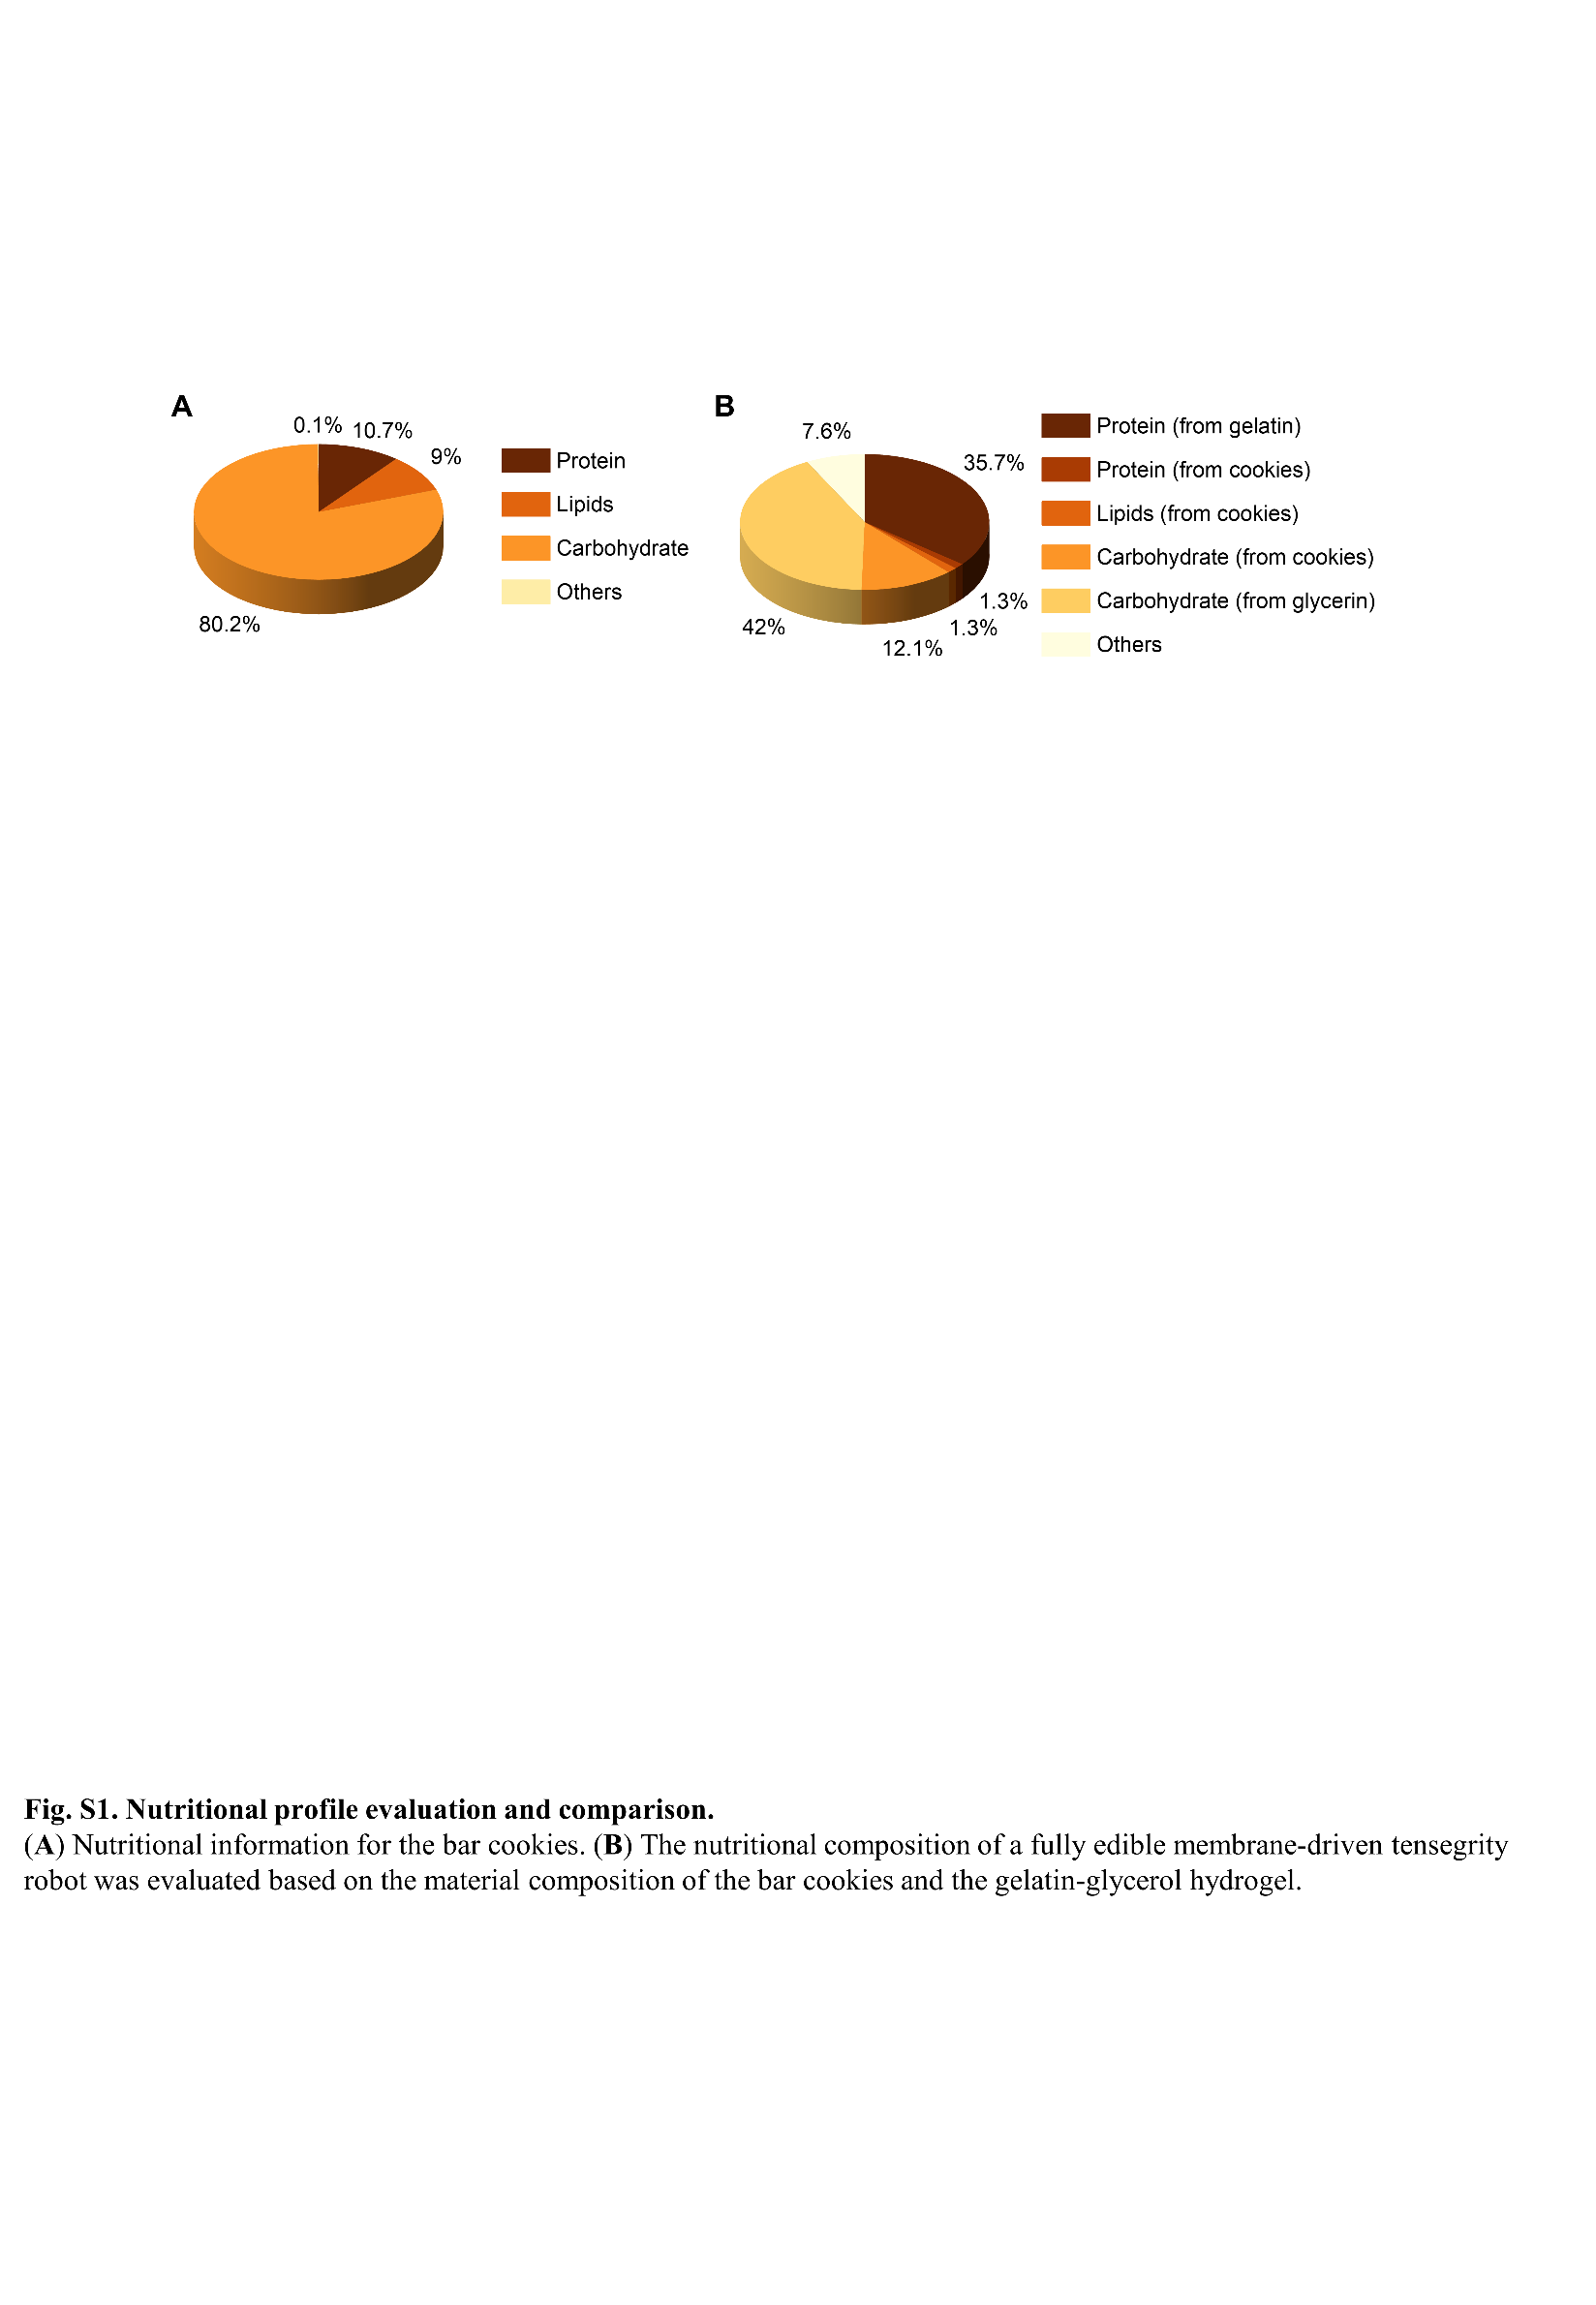


**Fig. S1. Nutritional profile evaluation and comparison.** (**A**) Nutritional information for the bar cookies. (**B**) The nutritional composition of a fully edible tensegrity robot was evaluated based on the material composition of the bar cookies and the gelatin-glycerol hydrogel.

Compared to recently reported edible aquatic robots, which possess a metabolizable energy density of approximately 3,572.22 kcal/kg, our edible tensegrity robot demonstrates a superior energy profile with a density of 3,759.44 kcal/kg. This difference is primarily driven by the optimized high-carbohydrate composition of the tensegrity framework. While the aquatic robot’s nutritional value is heavily partitioned between structural gelatin and fish-feed pellets, resulting in a balanced protein-to-carbohydrate ratio (*3*); our system prioritizes energy-dense edible components that maximize caloric output per unit of mass. Consequently, our robot not only achieves autonomous locomotion but also serves as a more efficient high-energy density reservoir for emergency scenarios.

**Supplementary Method Section S2. Benchmarking framework and comparative analysis**

Quantitative definitions of performance scales (0-5): to establish a rigorous evaluation framework for the proposed edible tensegrity robot, we defined a standardized scoring system across five specialized dimensions, with scores ranging from 0 to 5 in ascending order of capability. Edibility evaluates the safety and suitability of the robot for biological consumption; a score of 0 indicates non-ingestible industrial materials, while a score of 5 represents a platform composed entirely of food-grade ingredients that are safe for both human and animal ingestion. Degradability assesses the material’s lifecycle in natural environments; 0 denotes non-degradable synthetic polymers, whereas 5 signifies rapid, complete biodegradation into non-toxic organic compounds under ambient conditions. Eco-stealth quantifies the robot’s ability to merge with its surroundings without causing ecological disturbance; a score of 5 represents a high degree of biological mimicry in terms of chemical signature and physical appearance, minimizing the "foreign body" effect in delicate ecosystems. Nutritional Payload measures the robot's secondary function as a nutrient delivery system; 0 indicates no caloric or medicinal value, while 5 denotes a specialized formulation capable of delivering specific proteins, calories, or bioactive compounds to a target organism. Finally, Affordability reflects the cost-effectiveness of the materials and fabrication process; a score of 0 represents high-cost specialized components, whereas 5 identifies a system utilizing low-cost, widely accessible agricultural or food-based raw materials.

Scientific justification for the performance superiority: the exceptional performance of our edible tensegrity robot across these benchmarks is rooted in the strategic application of food-science-derived matrices within a tensegrity structural framework (Figure 1G). While conventional tensegrity robots (*4*–*7*), such as those discussed in Science Robotics or Soft Robotics, excel in mechanical resilience, they often fall short in ecological integration due to their reliance on silicone or carbon-fiber components. Our system bridges this gap by utilizing a gelatin-glycerol-based composite that inherently achieves a score of 5 in both Edibility and Degradability. Unlike synthetic soft robots that persist in the environment as microplastic pollutants, our platform transitions from a functional machine to organic fertilizer or animal feed upon task completion. Furthermore, the high Affordability and Nutritional Payload of our design are achieved by leveraging common biopolymers that can be enriched with specific vitamins or supplements during the molding process. This multifunctionality allows the robot to serve not only as a mobile sensor platform but also as a "functional food" carrier for wildlife conservation or medical applications. The Eco-stealth capability is a direct result of the material's organic nature, which exhibits lower acoustic and chemical contrast compared to metallic or plastic structures. By combining the structural robustness of tensegrity—which ensures the robot can navigate complex terrains—with the unique advantages of edible materials, our platform offers a transformative approach to environmentally-benign robotics that is fundamentally superior to traditional non-degradable systems.

**Supplementary Method Section S3. Fabrication of the edible pneumatic battery**

The fabrication of the edible pneumatic battery (Fig. S2) employed a multi-step molding process, comprising an internal beeswax fluid capsule and an external gelatin-based rigid housing. All soft silicone molds (Ecoflex 00-30) were replicated from 3D-printed master molds.


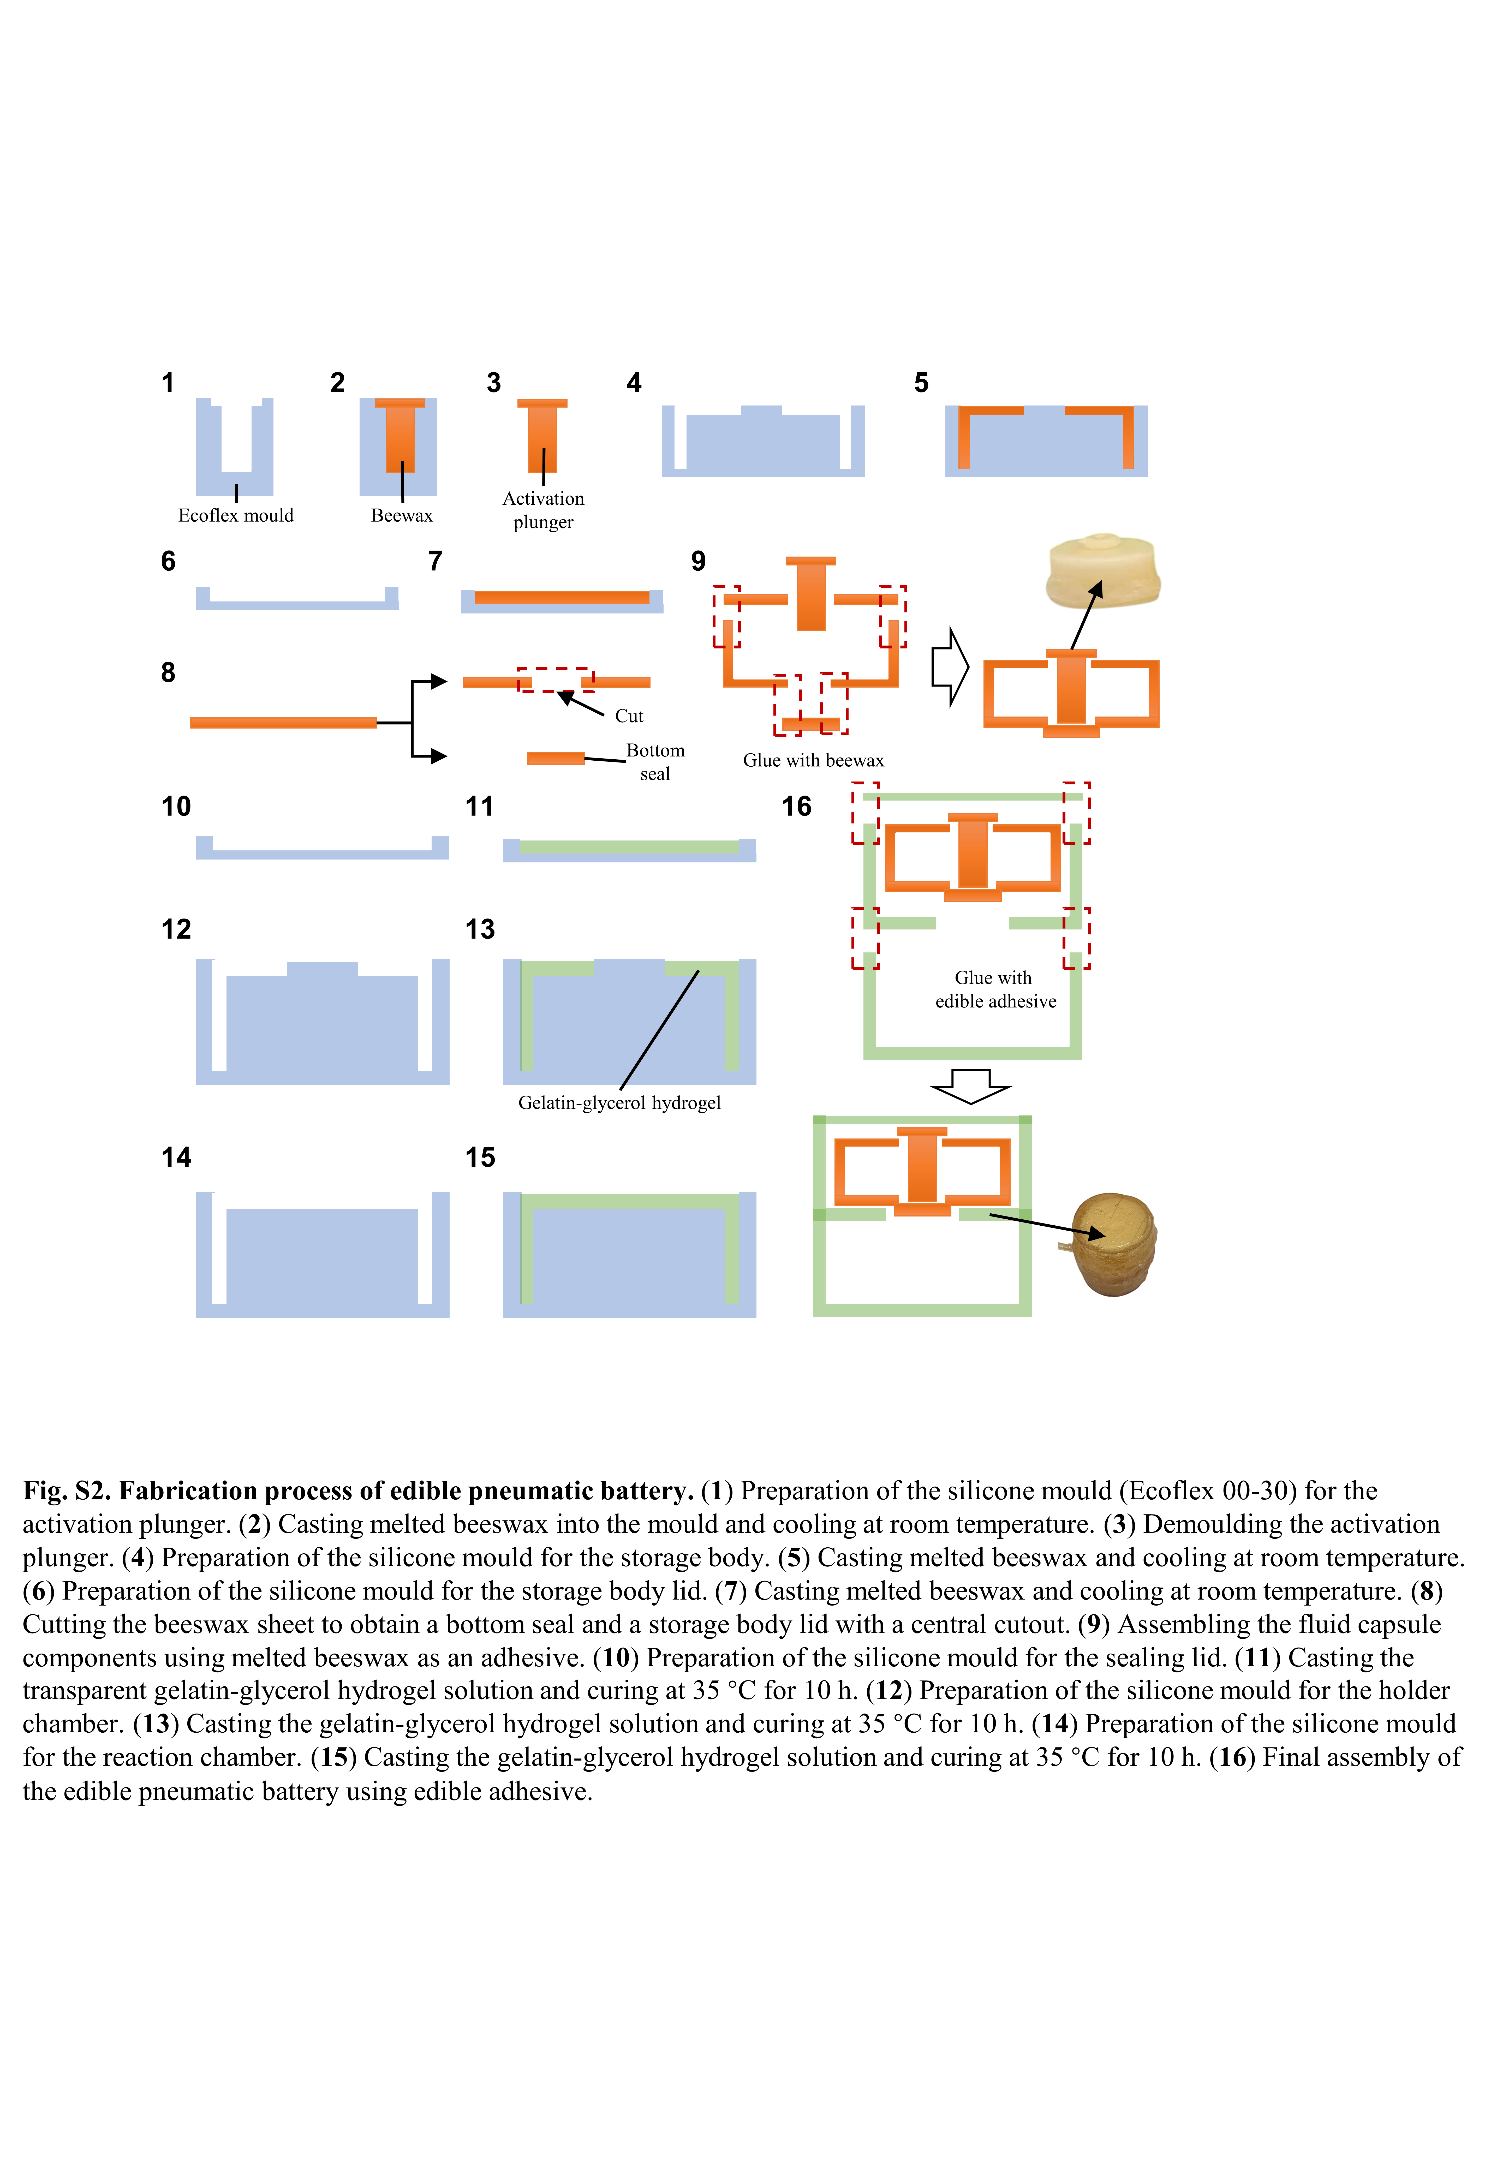


**Fig. S2. Fabrication process of edible pneumatic battery.** (**1**) Preparation of the silicone mould (Ecoflex 00-30) for the activation plunger. (**2**) Casting melted beeswax into the mould and cooling at room temperature. (**3**) Demoulding the activation plunger. (**4**) Preparation of the silicone mould for the storage body. (**5**) Casting melted beeswax and cooling at room temperature. (**6**) Preparation of the silicone mould for the storage body lid. (**7**) Casting melted beeswax and cooling at room temperature. (**8**) Cutting the beeswax sheet to obtain a bottom seal and a storage body lid with a central cutout. (**9**) Assembling the fluid capsule components using melted beeswax as an adhesive. (**10**) Preparation of the silicone mould for the sealing lid. (**11**) Casting the transparent gelatin-glycerol hydrogel solution and curing at 35 °C for 10 h. (**12**) Preparation of the silicone mould for the holder chamber. (**13**) Casting the gelatin-glycerol hydrogel solution and curing at 35 °C for 10 h. (**14**) Preparation of the silicone mould for the reaction chamber. (**15**) Casting the gelatin-glycerol hydrogel solution and curing at 35 °C for 10 h. (**16**) Final assembly of the edible pneumatic battery using edible adhesive.

Fluid capsule fabrication (Steps 1–9): The individual components of the fluid capsule—including the activation plunger, reservoir body, reservoir cap, and bottom seal—were cast using molten food-grade white beeswax at approximately 65°C. To streamline the manufacturing process and ensure structural integrity, the reservoir cap was post-processed via mechanical trimming to remove its central portion, forming a hollow annular ring. The bottom seal was fabricated independently through mechanical cutting, with its diameter intentionally designed to exceed the aperture of the annular cap. These components were subsequently bonded to the upper and lower openings of the reservoir body using molten beeswax as a thermal adhesive, resulting in a complete, non-hydrated fluid capsule.

Housing and final assembly (Steps 10–16): To provide sufficient structural rigidity to withstand internal pneumatic pressure, the reaction chamber, support chamber, and sealing cover were fabricated from a low-glycerol gelatin hydrogel (weight ratio of gelatin: glycerol: water = 1:0.4:3). The precursor solution was homogenized at 80°C, poured into the molds, and cured in an incubator at 35°C for 10 hours to establish a stable cross-linked network. In the final assembly stage, a stoichiometric mixture of citric acid and sodium bicarbonate powders was loaded into the base of the reaction chamber. Distilled water was injected into the fluid capsule before pre-positioning the activation plunger. The layers were then stacked in the sequence of reaction chamber, support chamber, fluid capsule, and sealing cover. Interfacial bonding was achieved using a high-viscosity edible gelatin adhesive (gelatin: water = 1:3), followed by air-drying at room temperature for 2 hours to ensure a hermetic seal.

**Supplementary Method Section S4. Construction and operational mechanism of the edible pneumatic circuit**

The construction of the fully edible pneumatic circuit (Fig. S3) aims to facilitate efficient energy transmission from the edible pneumatic battery to the gelatin membranes, employing a modulus-based material matching strategy. The gas transmission network is interconnected via rigid edible tubes fabricated through a "concentric molding" technique. In this process, a 2-mm diameter rod is suspended at the center of a plastic straw, into which a high-modulus gel precursor (Gel1-Gly04-W3) is cast. Once cured, the resulting hollow rigid conduits effectively resist radial expansion under internal pneumatic pressure. Conversely, to impart nonlinear opening characteristics to the monostable valves, both the membranes and chambers are molded from a soft, high-glycerol formulation (Gel1-Gly3-W3), with a central slit subsequently created via mechanical cutting. During the integration phase, the battery outlet, conduits, gelatin membranes, and valve components are hermetically bonded using edible adhesive to form a continuous pneumatic system.


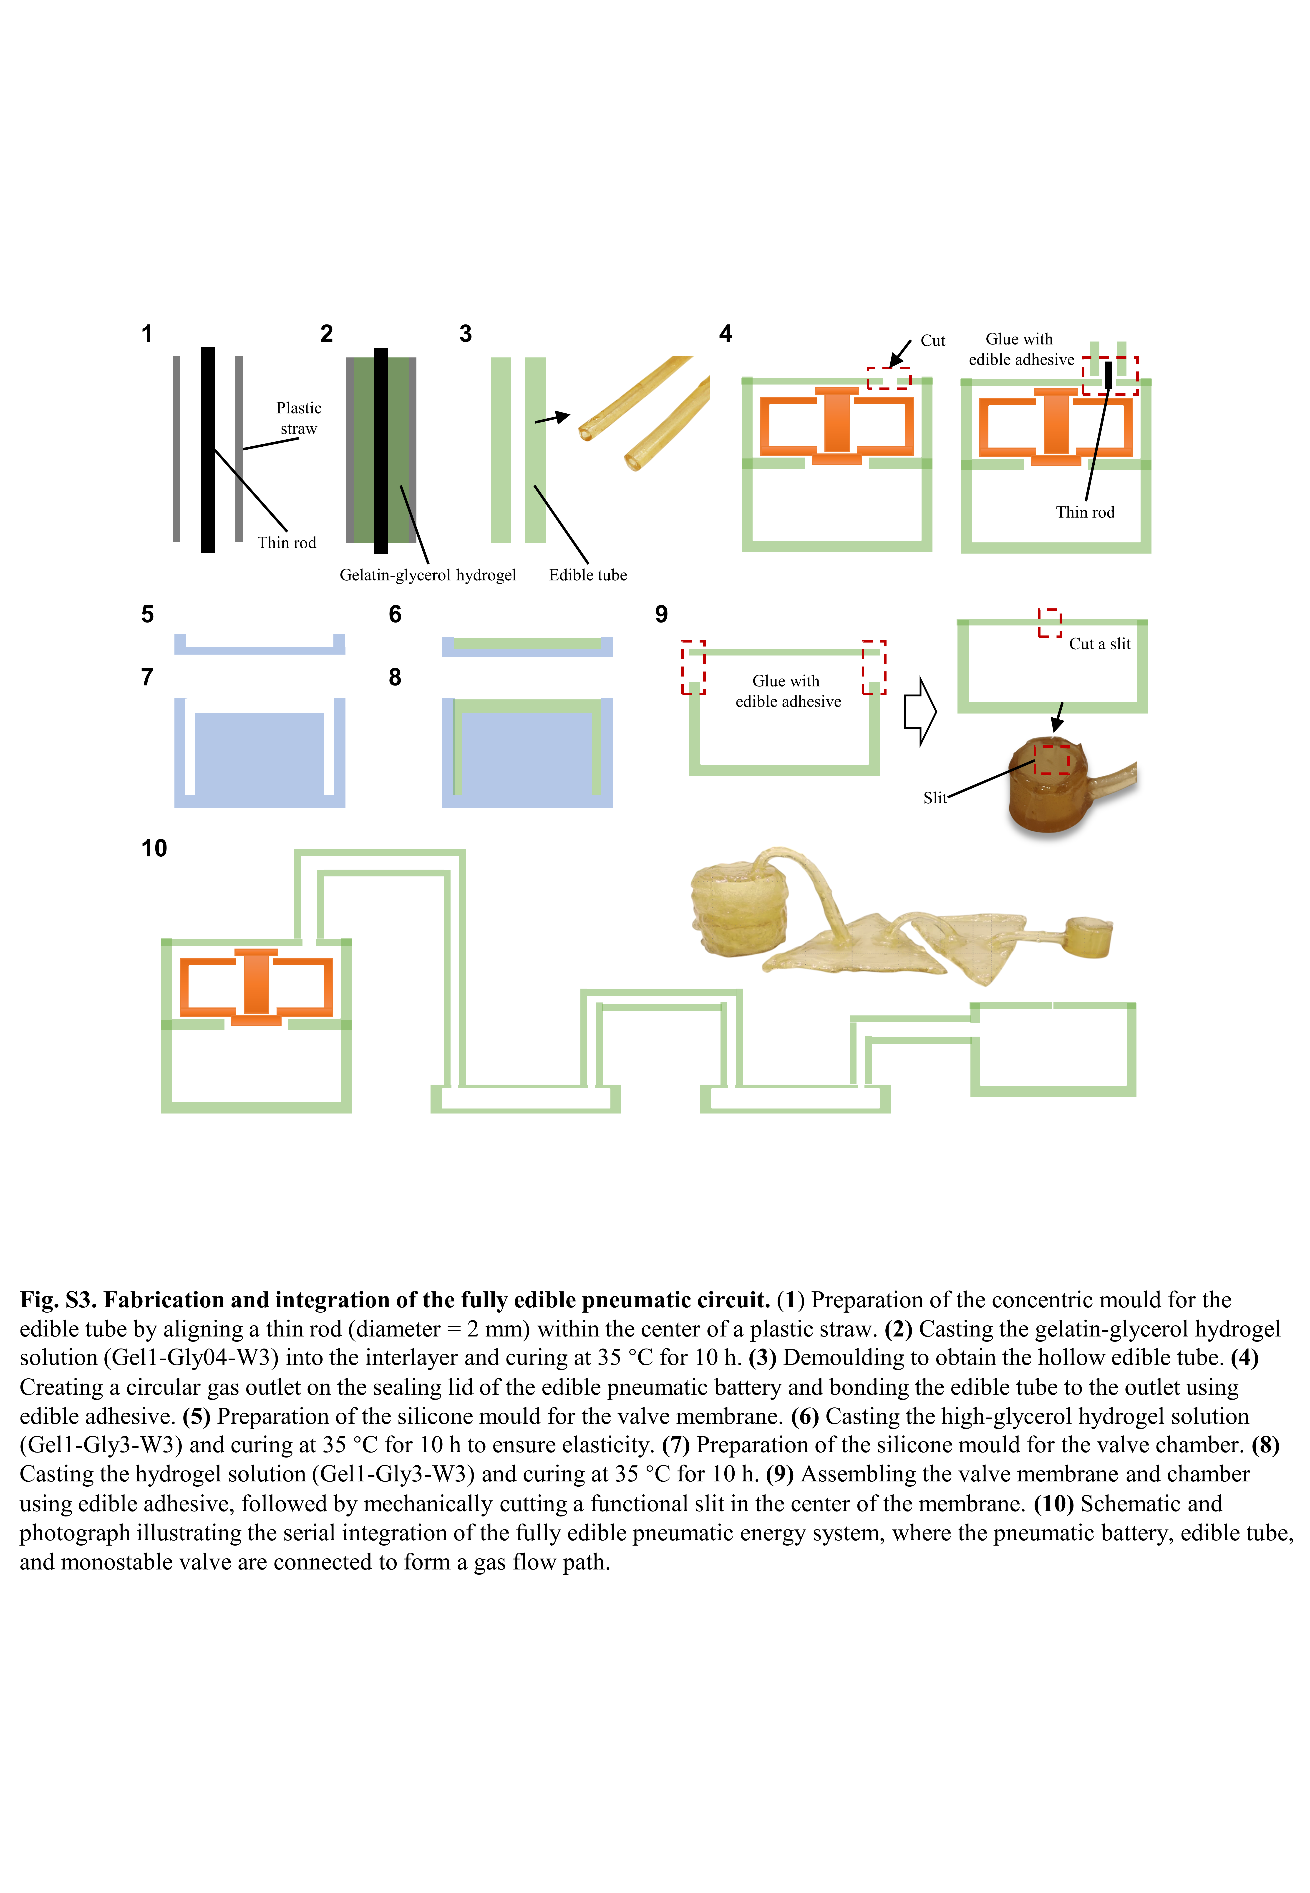


**Fig. S3. Fabrication and integration of the fully edible pneumatic circuit.** (**1**) Preparation of the concentric mould for the edible tube by aligning a thin rod (diameter = 2 mm) within the center of a plastic straw. **(2)** Casting the gelatin-glycerol hydrogel solution (Gel1-Gly04-W3) into the interlayer and curing at 35 °C for 10 h. **(3)** Demoulding to obtain the hollow edible tube. **(4)** Creating a circular gas outlet on the sealing lid of the edible pneumatic battery and bonding the edible tube to the outlet using edible adhesive. **(5)** Preparation of the silicone mould for the valve membrane. **(6)** Casting the high-glycerol hydrogel solution (Gel1-Gly3-W3) and curing at 35 °C for 10 h to ensure elasticity. **(7)** Preparation of the silicone mould for the valve chamber. **(8)** Casting the hydrogel solution (Gel1-Gly3-W3) and curing at 35 °C for 10 h. **(9)** Assembling the valve membrane and chamber using edible adhesive, followed by mechanically cutting a functional slit in the center of the membrane. **(10)** Schematic and photograph illustrating the serial integration of the fully edible pneumatic energy system, where the pneumatic battery, edible tube, and monostable valve are connected to form a gas flow path.

The operational mechanism relies on the sustained chemical generation of gas within the battery. As the airflow accumulates and is transmitted through the rigid conduits, it drives the out-of-plane expansion (bulging) of the connected gelatin membranes before the valve opens. This localized expansion shifts the robot's center of mass, thereby inducing rolling locomotion. Once the internal pressure reaches the critical threshold of the monostable valve, the slit opens instantaneously to release the gas, leading to a rapid pressure drop and subsequent membrane retraction.

**Supplementary Table S1**

The material mixing ratios of gelatin hydrogel (in mass) used in this study. Refer to Method, Supplementary Video S1, Supporting Method Section S2 and Supporting Method Section S3 for more details.

| **Gelatin: Glycerol: Water** | **Function** |
| --- | --- |
| 1: 3: 3 | Edible valve |
| 1: 1: 3 | Gelatin membrane and gelatin cap |
| 1: 0.4: 3 | Cylindrical housing for edible pneumatic battery and edible tube |
| 1: 0: 3 | Edible adhesive |

**Supplementary Table S2. In vivo biocompatibility and metabolic assessment**

The daily body mass variations of mice were recorded over a 7-day in vivo biocompatibility assessment period. The study comprised two groups (*n* = 6 per group): a control group (Nos. 1–6) maintained on a standard laboratory diet, and an experimental group (Nos. 7–12) for which the edible tensegrity robot served as the sole source of metabolic energy. Individual body mass data (in grams) were documented from Day 0 (baseline) through Day 7. The results indicate that weight fluctuations in the experimental group exhibited no statistically significant difference compared to the control group throughout the experimental cycle. Furthermore, all subjects maintain weights within healthy physiological ranges, demonstrating the excellent biosafety and metabolizable of the robotic system.

| **Mouse number** | **Day 0** | **Day 1** | **Day 2** | **Day 3** | **Day 4** | **Day 5** | **Day 6** | **Day 7** |
| --- | --- | --- | --- | --- | --- | --- | --- | --- |
| 1 | 24.1 | 24.2 | 24.0 | 23.9 | 24.1 | 24.3 | 24.1 | 24.4 |
| 2 | 23.5 | 23.3 | 22.5 | 22.7 | 23.2 | 23.3 | 23.1 | 22.8 |
| 3 | 22.8 | 22.1 | 22.9 | 23.0 | 23.2 | 22.8 | 23.1 | 23.0 |
| 4 | 23.0 | 23.5 | 22.6 | 22.9 | 22.3 | 22.3 | 22.0 | 21.9 |
| 5 | 23.6 | 23.9 | 23.4 | 23.2 | 22.9 | 23.3 | 23.5 | 23.2 |
| 6 | 22.5 | 22.9 | 23.5 | 23.0 | 22.4 | 22.5 | 23.0 | 23.5 |
| 7 | 23.9 | 23.5 | 22.6 | 22.6 | 22.9 | 23.5 | 23.5 | 23.2 |
| 8 | 23.7 | 23.7 | 23.3 | 22.5 | 23.2 | 22.8 | 23.1 | 22.8 |
| 9 | 22.8 | 23.0 | 22.0 | 22.5 | 22.1 | 22.7 | 23.4 | 23.2 |
| 10 | 23.0 | 23.1 | 22.1 | 22.9 | 22.7 | 23.2 | 22.5 | 22.3 |
| 11 | 23.9 | 23.8 | 22.6 | 23.3 | 23.1 | 22.8 | 22.3 | 22.3 |
| 12 | 22.9 | 22.7 | 22.9 | 22.1 | 22.0 | 21.9 | 22.3 | 22.3 |

**Supplementary Table S3. Organ weight and pathological evaluation**

At the experimental endpoint (Day 7), major organs were harvested to evaluate the long-term systemic effects of the robotic material consumption. Following euthanasia, the heart, liver, spleen, lungs, and kidneys were collected from both the control (*n* = 6) and experimental (*n* = 6) groups. The wet weight (in grams) of each organ was measured immediately upon dissection. Data analysis revealed no statistically significant differences (*P* > 0.05) in either the absolute organ weights or the organ-to-body weight indices (organ coefficients) between the two groups. Furthermore, no pathological alterations, such as hypertrophy, atrophy, or necrosis, were observed during gross anatomical examination. These results further substantiate that sustained ingestion of the edible robot yields no toxic side effects on primary metabolic organs or vital biological systems, underscoring the superior in vivo biocompatibility of the system.

| **Mouse number** | **Heart** | **Liver** | **Spleen** | **Lung** | **Kidney** |
| --- | --- | --- | --- | --- | --- |
| 1 | 0.14 | 0.13 | 0.05 | 0.14 | 0.18 |
| 2 | 0.14 | 0.15 | 0.03 | 0.15 | 0.16 |
| 3 | 0.11 | 0.15 | 0.05 | 0.15 | 0.14 |
| 4 | 0.13 | 0.13 | 0.03 | 0.13 | 0.13 |
| 5 | 0.14 | 0.12 | 0.04 | 0.12 | 0.13 |
| 6 | 0.12 | 0.11 | 0.05 | 0.11 | 0.14 |
| 7 | 0.13 | 0.14 | 0.04 | 0.14 | 0.14 |
| 8 | 0.12 | 0.15 | 0.06 | 0.15 | 0.13 |
| 9 | 0.11 | 0.13 | 0.07 | 0.13 | 0.12 |
| 10 | 0.12 | 0.13 | 0.03 | 0.13 | 0.18 |
| 11 | 0.11 | 0.13 | 0.05 | 0.13 | 0.15 |
| 12 | 0.13 | 0.13 | 0.05 | 0.13 | 0.18 |

**Supplementary Table S4. Primary antibodies and reagents**

The table below lists the primary antibodies and reagents required for in vivo metabolic validation experiments.

| **Reagent** | **Producer** |
| --- | --- |
| CK18 | Proteintech 66187-1-Ig |
| CD45 | Thermmo Fisher BS-4819R |
| DAPI | Beyotime |
| Goat Serum | GIBCO |

**Supplementary Video S1. Fabrication process of the edible tensegrity structure (separate file)**

This video demonstrates the complete fabrication procedure of the robot, including (i) the casting and curing of the gelatin membrane, (ii) the further processing of the bar cookies, and (iii) the final assembly of the tensegrity framework. Note that the footage has been accelerated for brevity.

**Supplementary Video S2. Evaluation of the mechanical properties of the edible tensegrity robot (separate file)**

This video presents the mechanical robustness and versatility of the tensegrity structure through three distinct demonstrations: (i) A static pressure test of the framework (accelerated 500X). (ii) A free-fall drop test conducted from a height of 1.7 m (recorded in real-time). (iii) A demonstration of the tensegrity structure being used as a soccer ball (recorded in real-time).

**Supplementary Video S3. Demonstrations of the edibility and recyclability of the robotic system (separate file)**

This video illustrates the material degradation and dietary utility of the edible robot through the following four demonstrations: (i) The dissolution behavior of robotic specimens in water (accelerated). (ii) A demonstration of the robot's recyclability as a processed food source, featuring a boiling process conducted at 59°C (accelerated). (iii) An in vitro simulated digestion experiment showing the breakdown of materials (accelerated). (iv) A validation of the robot as a sustainable food source, showcasing the tensegrity structure before and after consumption by mice to highlight its full edibility.

**Supplementary Video S4. Demonstration of actuation and locomotion for the fully edible robot (separate file)**

This video illustrates the operational mechanisms and exercise realization of the robotic system: (i) A demonstration of the edible pneumatic battery driving the gelatin membrane (accelerated 2X). (ii) A demonstration of the monostable valves showing the instantaneous opening and closing behavior (slowed down to 0.5 X). (iii) A demonstration of the rolling locomotion performed by the fully edible tensegrity robot (recorded in real-time).

**Supplementary Reference**

1. M. Hervera, M. D. Baucells, C. Torre, A. Buj, C. Castrillo, Prediction of digestible energy value of extruded dog food: comparison of methods. *J. Anim. Physiol. Anim. Nutr.* **92**, 253–259 (2008).

2. M. L. Zou, P. J. Moughan, A. Awati, G. Livesey, Accuracy of the Atwater factors and related food energy conversion factors with low-fat, high-fiber diets when energy intake is reduced spontaneously. *Am. J. Clin. Nutr.* **86**, 1649–1656 (2007).

3. S. Zhang, B. Kwak, R. Zhu, M. Pankhurst, L. Zhang, R. M. Boom, D. Floreano, Edible aquatic robots with Marangoni propulsion. *Nat Commun* **16**, 4238 (2025).

4. J. Jeong, I. Kim, Y. Choi, S. Lim, S. Kim, H. Kang, D. Shah, R. Baines, J. W. Booth, R. Kramer-Bottiglio, S. Y. Kim, Spikebot: A Multigait Tensegrity Robot with Linearly Extending Struts. *Soft Robot.* **11**, 207–217 (2024).

5. Y. Liu, Q. Bi, X. Dai, R. Song, J. Zhao, Y. Li, TICBot: Development of a Tensegrity-Based In-Pipe Crawling Robot. *IEEE Trans. Ind. Electron.* **70**, 8184–8193 (2023).

6. Y. Liu, X. Dai, Z. Wang, Q. Bi, R. Song, J. Zhao, Y. Li, A Tensegrity-Based Inchworm-Like Robot for Crawling in Pipes With Varying Diameters. *IEEE Robot. Autom. Lett.* **7**, 11553–11560 (2022).

7. H. Lee, Y. Jang, J. K. Choe, S. Lee, H. Song, J. P. Lee, N. Lone, J. Kim, 3D-printed programmable tensegrity for soft robotics. *Sci. Robot.* **5**, eaay9024 (2020).
